# Supplementary material
Source: MDPI journal article supplement (https://www.mdpi.com/2076-3417/10/17/6073)

# S1. Questionnaire for computer-based 3D simulation in dental occlusion education

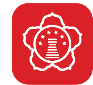

|                                                                                                                                               | Strongly disagree<br>1 | Disagree<br>2 | Neutral<br>3 | Agree<br>4 | Strongly agree<br>5 |
|-----------------------------------------------------------------------------------------------------------------------------------------------|------------------------|---------------|--------------|------------|---------------------|
| 1. The 3D simulation supplies a practical view of anatomic structures, such as dental anatomy, arch shape, and jaws.                          |                        |               |              |            |                     |
| 2. The 3D simulation is efficient and effective method to memorize the principles for occlusal adjustment in centric and eccentric relations. |                        |               |              |            |                     |
| 3. The 3D simulation using computer software facilitates the active participation of learners in class.                                       |                        |               |              |            |                     |
| 4. The 3D simulation is useful to understand the functional movement of the mandible.                                                         |                        |               |              |            |                     |
| 5. The 3D simulation is convenient for students to perform in computer software.                                                              |                        |               |              |            |                     |

## S2. Examination for dental occlusion

▪ Student number ( ) ▪ Name ( )

1. When closing the mouth in centric occlusion, a premature occlusal contact happened in the molar area. If the occlusal interference was not found in the excursive movement of the mandible, which tooth structure should be adjusted in the occlusal surface, fossa or cusp?

2. When closing the mouth in centric occlusion, a premature occlusal contact happened in the molar area. If the occlusal interference was found in the excursive movement of the mandible, which tooth structure should be adjusted in the occlusal surface, fossa or cusp?

3. An occlusal premature contact was found when closing the mouth in the centric relation as the illustration below. Which area should be removed (e.g. lingual aspect of buccal cusp in maxillary tooth)?

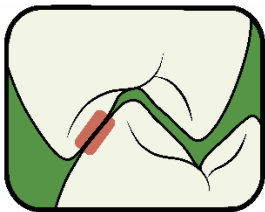

4. An occlusal premature contact was found when closing the mouth in the centric relation as the illustration below. Which area should be removed (e.g. lingual aspect of buccal cusp in maxillary tooth)?

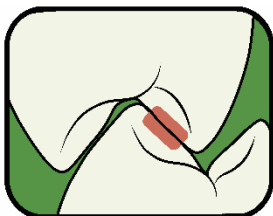

5. An occlusal premature contact was found when closing the mouth in the centric relation as the illustration below. Which area should be removed (e.g. lingual aspect of buccal cusp in maxillary tooth)?

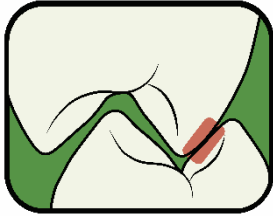

6. An occlusal interference was found in the eccentric movement of the mandible as the illustration below. Which area should be removed (e.g. lingual aspect of buccal cusp in Maxillary tooth)?

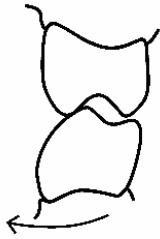

7. An occlusal interference was found in the excursive movement of the mandible (eccentric occlusion) as the illustration below. Which area should be removed (e.g. lingual aspect of buccal cusp in maxillary tooth)?

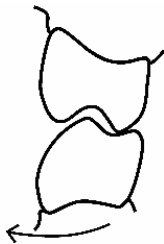

8. An occlusal interference was found in the excursive movement of the mandible (eccentric occlusion) as the illustration below. Which area should be removed (e.g. lingual aspect of buccal cusp in maxillary tooth)?

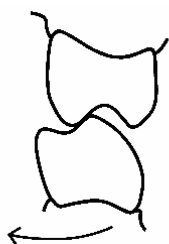

Supplement: s1 [file s1]
